# Supplementary material
Source: ML conference proceedings conference paper supplement (https://openaccess.thecvf.com/content/ICCV2023/html/Jin_Recursive_Video_Lane_ICCV_2023_paper.html)
Supplement: Supplementary file 2 [file Jin_Recursive_Video_Lane_ICCV_2023_supplemental.zip]

Archive with 3 entries (3 files):
- 05991-supp.pdf
- Figure 13.mp4
- Overview and results.mp4
